## RESEARCH ARTICLE

## Adipokines and risk of rheumatoid arthritis: A two-sample multivariable Mendelian randomisation study

Georgios K. Vasileiadis<sup>1,2</sup>, Sergi Sayols<sup>3,4</sup>, Sizheng Steven Zhao<sup>5</sup>, Tahzeeb Fatima<sup>1,2,6</sup>, Cristina Maglio<sup>1,2,6\*</sup>

**1** Department of Rheumatology and Inflammation Research, Institute of Medicine, The Sahlgrenska Academy at University of Gothenburg, Gothenburg, Sweden, **2** Wallenberg Centre for Molecular and Translational Medicine at the University of Gothenburg, Gothenburg, Sweden, **3** Department of Medical Sciences, Molecular Epidemiology and Science for Life Laboratory, Uppsala University, Uppsala, Sweden, **4** CIBER Cardiovascular Diseases (CIBERCV), Instituto de Salud Carlos III, Madrid, Spain, **5** Division of Musculoskeletal and Dermatological Sciences, Centre for Genetics and Genomics Versus Arthritis, School of Biological Sciences, Faculty of Biology Medicine and Health, Manchester Academic Health Science Centre, The University of Manchester, Manchester, United Kingdom, **6** Department of Rheumatology, Sahlgrenska University Hospital, Gothenburg, Sweden

\* [cristina.maglio@gu.se](mailto:cristina.maglio@gu.se)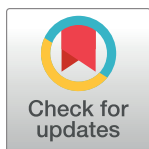

## OPEN ACCESS

**Citation:** Vasileiadis GK, Sayols S, Zhao SS, Fatima T, Maglio C (2023) Adipokines and risk of rheumatoid arthritis: A two-sample multivariable Mendelian randomisation study. PLoS ONE 18(6): e0286981. <https://doi.org/10.1371/journal.pone.0286981>

**Editor:** Guglielmo Campus, University of Bern: Universitat Bern, SWITZERLAND

**Received:** December 5, 2022

**Accepted:** May 29, 2023

**Published:** June 9, 2023

**Copyright:** © 2023 Vasileiadis et al. This is an open access article distributed under the terms of the [Creative Commons Attribution License](https://creativecommons.org/licenses/by/4.0/), which permits unrestricted use, distribution, and reproduction in any medium, provided the original author and source are credited.

**Data Availability Statement:** All relevant data are within the paper and its [Supporting Information](#) files.

**Funding:** C.M. from the Knut and Alice Wallenberg Foundation [<https://kaw.wallenberg.org/en>] and the Wallenberg Centre for Molecular and Translational Medicine at the University of Gothenburg, Sweden [<https://www.gu.se/en/molecular-translational-medicine>] as well as from the Swedish Society for Medical Research (S20-0109) [<https://www.ssmf.se>]. S.S.Z. is supported by a National Institute for

## Abstract

Adiponectin, leptin, and resistin are thought to be involved in the pathogenesis of rheumatoid arthritis (RA). However, the causal relationship between these adipokines and the risk for RA is unclear. We performed a range of two-sample Mendelian randomisation (MR) analyses to assess the causal effect of circulating adiponectin, leptin, and resistin on RA risk in European and East Asian individuals. Different sets of adiponectin-, leptin-, and resistin-related genetic variants were used as instruments for genetically determined adipokine levels. As body mass index (BMI) is a risk factor for RA and affects adipokine levels, multivariable MR was used to calculate the causal effect of each adipokine on RA risk taking BMI into account. Several MR analyses revealed no evidence of a causal relationship between circulating adiponectin, leptin, or resistin levels and RA risk in either Europeans or East Asians. Similarly, multivariable MR did not provide evidence of any causal effect of adiponectin, leptin, or resistin on RA risk when taking BMI into account. This MR study shows for the first time that genetically determined levels of adiponectin, leptin, or resistin do not have a direct causal effect on the risk of developing RA after adjustment for BMI.

## Introduction

Adiponectin, leptin, and resistin are cytokines produced by the adipose tissue, so called adipokines, and they are thought to be involved in the pathogenesis of rheumatoid arthritis (RA), a chronic inflammatory disease [1, 2]. In fact, adiponectin, leptin, and resistin levels are increased in both blood and synovial fluid of patients with RA [3–7]. All three adipokines have been associated with markers of inflammation and disease activity in patients with RA [4, 8–11]. In addition, we previously showed that circulating adiponectin levels rise years before RA

Health Research Clinical Lectureship [<https://www.nihr.ac.uk>] and works in centres supported by Versus Arthritis (grant no. 21755, 21173, 21754 and 21755) [<https://www.versusarthritis.org>]. The funders had no role in study design, data collection and analysis, decision to publish, or preparation of the manuscript.

**Competing interests:** The authors have declared that no competing interests exist.

onset [12, 13]. All these epidemiological findings suggest that adiponectin, leptin and resistin could be involved in the initiation and progression of RA. However, a causal association between these adipokines and RA risk cannot be postulated from such epidemiological studies alone, as they might be biased by confounders and reverse causality.

Mendelian randomisation (MR) is an analytical method that aims to estimate if a certain exposure (in our case, adipokines) has a causal relationship with a certain outcome (in our case, RA) by using genetic variants for a given exposure as instrumental variables (IVs) [14]. A recent MR study conducted in Europeans demonstrated that circulating adiponectin levels are not causally associated with the risk of developing RA [15]. However, that study used univariate MR and did not consider body-mass index (BMI) as a confounder. This is a limitation because high BMI is a risk factor for RA and is also associated with lower circulating levels of adiponectin [16, 17]. Therefore, any analysis of the causal relationship between adiponectin and RA needs to account for the potential confounding role of BMI.

The purpose of this study was to determine whether circulating adiponectin, leptin, or resistin levels are causally associated with the risk of developing RA by using a two-sample MR approach. We also performed a multivariable MR to determine if adiponectin, leptin, or resistin have a causal effect on RA development independently of BMI.

## Materials and methods

### Data sources

IVs for adiponectin, leptin, resistin, and RA were derived from large Genome-wide association studies (GWASs). Specifically, we used data from the largest meta-analysis of GWASs in Europeans, involving 39,883 individuals [18], and from a meta-analysis of GWASs involving 18,079 individuals of East Asian ancestry [19] to construct genetic IVs for circulating adiponectin levels. Genetic variants related to circulating leptin levels were identified from a GWAS including a total of 52,140 individuals of European ancestry [20]. Furthermore, a genetic dataset for circulating resistin levels was built from data from a genome-wide meta-analysis involving 30,931 Europeans from the Systematic and Combined AnaLysis of Olink Proteins (SCALOP) consortium [21]. We obtained regression coefficients and corresponding standard errors for the association between adipokine-related single-nucleotide polymorphisms (SNPs) and the risk to develop RA for both European and East Asian populations from a three-stage trans-ethnic GWAS meta-analysis in a total of 80,799 subjects [22]. The meta-analysis evaluated ~10 million SNPs. All 29,880 RA cases (88.1% seropositive and 9.3% seronegative for anti-citrullinated peptide antibody [ACPA] or rheumatoid factor [RF], and 2.6% of unknown autoantibody status) fulfilled the 1987 criteria of the American College of Rheumatology for RA diagnosis or were diagnosed with RA by a rheumatologist [23]. All GWAS data were publicly available.

To run the multivariable MR analyses, publicly available summary statistics data of two separate BMI GWASs, in European and East Asian individuals, were used to obtain the information for IV-BMI associations. For Europeans, the information was extracted using the results from a meta-analysis of GWASs for BMI. The study combined the summary statistics of the Genetic Investigation of ANthropometric Traits (GIANT) consortium [24] with a BMI GWAS in the UK Biobank cohort and included around 700,000 individuals of European ancestry [25]. To obtain the IV-BMI association data in East Asians, the summary statistics data from a GWAS in Biobank Japan project including 173,430 individuals was used [26].

### Ethics statement

This study only used published or publicly available data and no original data were collected. Ethical approval by the corresponding institutional review board or ethics committee

including information on participants' written informed consent for each of the studies included here can be found in the original publications.

### Instrumental variables

Summary statistics data of ten and four adiponectin-related SNPs were derived, respectively, for European and East Asian populations from their respective studies (S1 Table) [18, 19]. All SNPs were associated with circulating adiponectin levels at genome-wide significance ( $p$ -value  $< 5 \times 10^{-8}$ ) and were not in linkage disequilibrium (LD) with each other ( $r^2 < 0.1$ ). Variance explained ( $R^2$ ) was calculated using  $2 \times \text{EAF}(1 - \text{EAF})\beta^2$ , where EAF is the effect allele frequency and  $\beta$  the association estimate. F-statistic was derived using  $(R^2/K)/[(1 - R^2)(N - K - 1)]$ , where K is the number of SNPs and N is the sample size. F-statistic  $> 10$  is considered suggestive of adequate instrument strength [27]; all SNPs with F-statistics at or below 10 were excluded from the analysis. While the SNP rs2980879 fulfilled the selection criteria, it was excluded from the analyses for being palindromic. We built two sets of genetic instruments to perform two MR analyses for circulating adiponectin in the European population:

1. A liberal analysis, which consisted of all ten SNPs regardless of locus (S1 Table)
2. A conservative analysis, which only consisted of four SNPs within the *ADIPOQ* locus ( $\pm 50$  kb) (S1 Table). As *ADIPOQ* encodes adiponectin, we regarded this approach as unlikely to be biased by horizontal pleiotropy considering the functional relationship between *ADIPOQ* and circulating adiponectin levels.

For East Asians, a single set of instruments was used as IVs to perform liberal MR analysis, as there was only one SNP within the *ADIPOQ* locus, precluding a conservative MR analysis.

Four SNPs (S1 Table) were selected as IVs for circulating leptin levels, after exclusion of two palindromic SNPs, rs8043757 and rs10487505 [20]. All SNPs were associated with circulating leptin levels at  $p$ -value  $< 5 \times 10^{-5}$ , were not in LD with each other ( $r^2 < 0.1$ ), and had F-statistics  $> 10$ .

Eleven SNPs derived from the European population were selected as IVs for circulating resistin levels (S1 Table) [21]. All SNPs were associated with circulating resistin levels at genome-wide significance ( $p$ -value  $< 5 \times 10^{-8}$ ), were not in LD with each other ( $r^2 < 0.1$ ), and had F-statistics  $> 10$ . For Europeans, rs77691416 was replaced with a proxy SNP (rs17616841) in the outcome data at an  $r^2 = 1$  (S2 Table).

### Main MR analysis

We performed single SNP analysis for each of the selected SNPs, where MR estimates were calculated using the Wald ratio method [28]. The effect of each adipokine's levels on RA risk was calculated using the inverse-variance weighted (IVW) method, with a random-effects model. The IVW method is considered the most efficient as it carries the greatest statistical power [29]. However, IVW is subject to bias, since it assumes the absence of any horizontal pleiotropy i.e., the effects of the genetic instruments on the considered outcome through pathways independent of the exposure [29]. To address this, we performed several sensitivity analyses with more flexible assumptions on horizontal pleiotropy. To account for multiple testing in three adipokines to RA causality measurements, we used Bonferroni correction (0.05/3). A  $p$ -corrected of 0.016 was considered statistically significant to indicate a causal effect.

### Sensitivity analysis

We estimated the intercept and slope of MR-Egger regression, where intercept represents the average horizontal pleiotropy while slope indicates a pleiotropy-adjusted MR estimate. A

statistically significant intercept value ( $p < 0.05$ ) indicates the presence of horizontal pleiotropy [30]. In addition, the weighted median-based method was utilized, which measures the weighted median effect of all MR estimates produced by individual instruments, with weights equal to the inverse of the standard error. Finally, to identify whether a single genetic variant is driving the association between exposure and outcome, leave-one-out analysis was executed. In a leave-one-out analysis, MR is performed by leaving each SNP out of the analysis in turn. All analyses were conducted using the 'MendelianRandomization' package (v 0.5.0) in R (v 4.0.2) [31, 32].

## Multivariable MR analysis

We applied multivariable MR to assess if BMI modulates the causal effect of adiponectin, leptin or resistin on RA risk by adding BMI as an adjusting factor in the model. Multivariable MR is an extension of MR that deals with genetic variants that are associated with multiple risk factors [33]. It accounts for the potential pleiotropic effect of all exposures included in the analysis. To run this analysis, summary statistics data for all the IVs for adiponectin, leptin, and resistin were obtained from two separate GWASs for BMI [24, 25]. As multivariable MR requires all instruments to be associated with at least one exposure in the regression model, initially all variants were chosen to be included in the analysis. However, as the variant-BMI association data were missing for certain SNPs, these were either replaced by proxies at high LD ( $r^2 \geq 0.99$ ), where available (S2 Table), or excluded from the final analyses. Regarding adiponectin in Europeans, rs1108842 was excluded from the final analysis, as variant-BMI association data were missing for this SNP and no proxies could be identified, leaving the instrument list to a count of 9. Concerning resistin in Europeans, four SNPs were excluded (rs10103048, rs3745367, rs73008259 and rs7589428) while three SNPs were replaced with proxies: rs3087852 replaced with rs8075668, at  $r^2 = 0.99$ ; rs4134826 replaced with rs4134831, at  $r^2 = 1$ ; rs6775731 replaced with rs2010527, at  $r^2 = 1$ . In all populations, separate multivariable MR analyses were done using a 'weighted regression-based method' approach that applies the IVW to a multivariable regression model [33]. Considering the selected set of instrument variants were uncorrelated, a random effect model was implied. Similar to the univariate MR, we also performed MR-Egger analysis for multivariable MR as a sensitivity analysis using multivariable weighted linear regression method [34]. All analyses were conducted using the 'MendelianRandomization' package (v 0.5.0) in R (v 4.0.2) [31, 32].

## Results

### No causal effect of adiponectin on the risk for RA

To determine if circulating levels of adiponectin were causally associated with the risk for RA, we first performed a univariate MR analysis in both Europeans and East-Asians. In Europeans, neither a liberal (odds ratio, OR = 1.05; 95% confidence interval, CI = 0.85–1.31;  $p = 0.65$ ) nor a conservative approach (OR = 0.95; 95% CI = 0.75–1.22;  $p = 0.70$ , Table 1 and Fig 1A) revealed evidence of a causal effect of circulating adiponectin levels on RA risk. Similarly, adiponectin did not affect the risk of developing RA in East Asians (OR = 1.04; 95% CI = 0.82–1.33;  $p = 0.74$ ; Table 1 and Fig 1A). Sensitivity analyses confirmed this lack of effect (Table 1, Fig 1A, S1 Fig).

In Europeans, directional pleiotropy was found to be unlikely to bias the results, as shown by the Egger intercept in both liberal ( $p = 0.09$ ) and conservative analyses ( $p = 0.83$ ), suggesting reliability of the MR estimates. Conversely, directional pleiotropy was detected in East Asians, as shown by the Egger intercept ( $p = 0.004$ , Table 1). In addition, the leave-one-out analysis

**Table 1. MR estimates from each method for assessing the causal effect of adiponectin, leptin, and resistin on the risk of RA in Europeans and East Asians.**

|                                    |             |                           |           |                       |          |
|------------------------------------|-------------|---------------------------|-----------|-----------------------|----------|
| <b>Adiponectin</b>                 |             |                           |           |                       |          |
| Liberal analysis in Europeans      |             |                           |           |                       |          |
| <i>MR method</i>                   | <i>SNPs</i> | <i><math>\beta</math></i> | <i>SE</i> | <i>OR (95% CI)</i>    | <i>p</i> |
| Random-effects IVW                 | 10          | 0.050                     | 0.11      | 1.05 (0.85–1.31)      | 0.65     |
| Weighted median                    | 10          | -0.011                    | 0.14      | 0.99 (0.75–1.30)      | 0.94     |
| Egger intercept                    | 10          | 0.021                     | 0.01      | 1.02 (1.00–1.04)      | 0.09     |
| MR-Egger                           | 10          | -0.235                    | 0.20      | 0.79 (0.53–1.17)      | 0.24     |
| MVMR adjusting for BMI             | 9           | -0.032                    | 0.12      | 0.97 (0.77–1.21)      | 0.78     |
| MVMR Egger                         | 9           | -0.008                    | 0.24      | 0.99 (0.61–1.60)      | 0.97     |
| Conservative analysis in Europeans |             |                           |           |                       |          |
| <i>MR method</i>                   | <i>SNPs</i> | <i><math>\beta</math></i> | <i>SE</i> | <i>OR (95% CI)</i>    | <i>p</i> |
| Random-effects IVW                 | 4           | -0.048                    | 0.12      | 0.95 (0.75–1.22)      | 0.70     |
| Weighted median                    | 4           | -0.031                    | 0.14      | 0.97 (0.73–1.28)      | 0.83     |
| Egger intercept                    | 4           | -0.006                    | 0.03      | 0.99 (0.94–1.05)      | 0.83     |
| MR-Egger                           | 4           | 0.014                     | 0.30      | 1.01 (0.56–1.84)      | 0.96     |
| East Asians                        |             |                           |           |                       |          |
| <i>MR method</i>                   | <i>SNPs</i> | <i><math>\beta</math></i> | <i>SE</i> | <i>OR (95% CI)</i>    | <i>p</i> |
| Random-effects IVW                 | 4           | 0.041                     | 0.12      | 1.04 (0.82–1.33)      | 0.74     |
| Weighted median                    | 4           | 0.006                     | 0.08      | 1.01 (0.87–1.16)      | 0.94     |
| Egger intercept                    | 4           | 0.065                     | 0.02      | 1.07 (1.02–1.12)      | 0.004    |
| MR-Egger                           | 4           | -0.249                    | 0.12      | 0.78 (0.61–0.99)      | 0.042    |
| MVMR adjusting for BMI             | 4           | -0.017                    | 0.20      | 0.98 (0.66–1.46)      | 0.93     |
| MVMR Egger                         | 4           | -0.250                    | 0.12      | 0.78 (0.62–0.99)      | 0.044    |
| <b>Leptin</b>                      |             |                           |           |                       |          |
| <i>MR method</i>                   | <i>SNPs</i> | <i><math>\beta</math></i> | <i>SE</i> | <i>OR (95% CI)</i>    | <i>p</i> |
| Random-effects IVW                 | 4           | 0.481                     | 0.34      | 1.62 (0.84–3.13)      | 0.15     |
| Weighted median                    | 4           | 0.340                     | 0.39      | 1.41 (0.66–2.99)      | 0.38     |
| Egger intercept                    | 4           | 0.067                     | 0.16      | 1.07 (0.79–1.45)      | 0.66     |
| MR-Egger                           | 4           | -1.710                    | 5.06      | 0.18 (0.00–3.68)      | 0.74     |
| MVMR adjusting for BMI             | 4           | 1.132                     | 1.00      | 3.10 (0.44–21.93)     | 0.26     |
| MVMR Egger                         | 4           | 0.993                     | 7.12      | 2.70 (0.00–3,078,644) | 0.89     |
| <b>Resistin</b>                    |             |                           |           |                       |          |
| <i>MR method</i>                   | <i>SNPs</i> | <i><math>\beta</math></i> | <i>SE</i> | <i>OR (95% CI)</i>    | <i>p</i> |
| Random-effects IVW                 | 11          | -0.109                    | 0.15      | 0.90 (0.67–1.19)      | 0.46     |
| Weighted median                    | 11          | -0.025                    | 0.13      | 0.98 (0.75–1.27)      | 0.85     |
| Egger intercept                    | 11          | -0.033                    | 0.04      | 0.97 (0.89–1.05)      | 0.42     |
| MR-Egger                           | 11          | 0.304                     | 0.54      | 1.36 (0.47–3.89)      | 0.57     |
| MVMR adjusting for BMI             | 7           | -0.134                    | 0.15      | 0.88 (0.65–1.18)      | 0.38     |
| MVMR Egger                         | 7           | -0.070                    | 0.75      | 0.93 (0.21–4.06)      | 0.93     |

Abbreviations: MR, Mendelian randomisation; RA, rheumatoid arthritis; SNP, single nucleotide polymorphism; SE, standard error; OR, odds ratio; 95% CI, 95% confidence interval; IVW, inverse-variance weighted; MVMR, multivariable MR; BMI, body mass index.

<https://doi.org/10.1371/journal.pone.0286981.t001>

suggested that the main MR outcome in East Asians was driven by a single SNP, rs4783244 (S1 Fig).

We then performed a multivariable analysis by taking BMI into account in the model. The results of the univariate analysis were confirmed by multivariable MR, which showed no causal effect of adiponectin on RA in both Europeans (OR = 0.97; 95% CI = 0.77–1.21;  $p = 0.78$ ) and

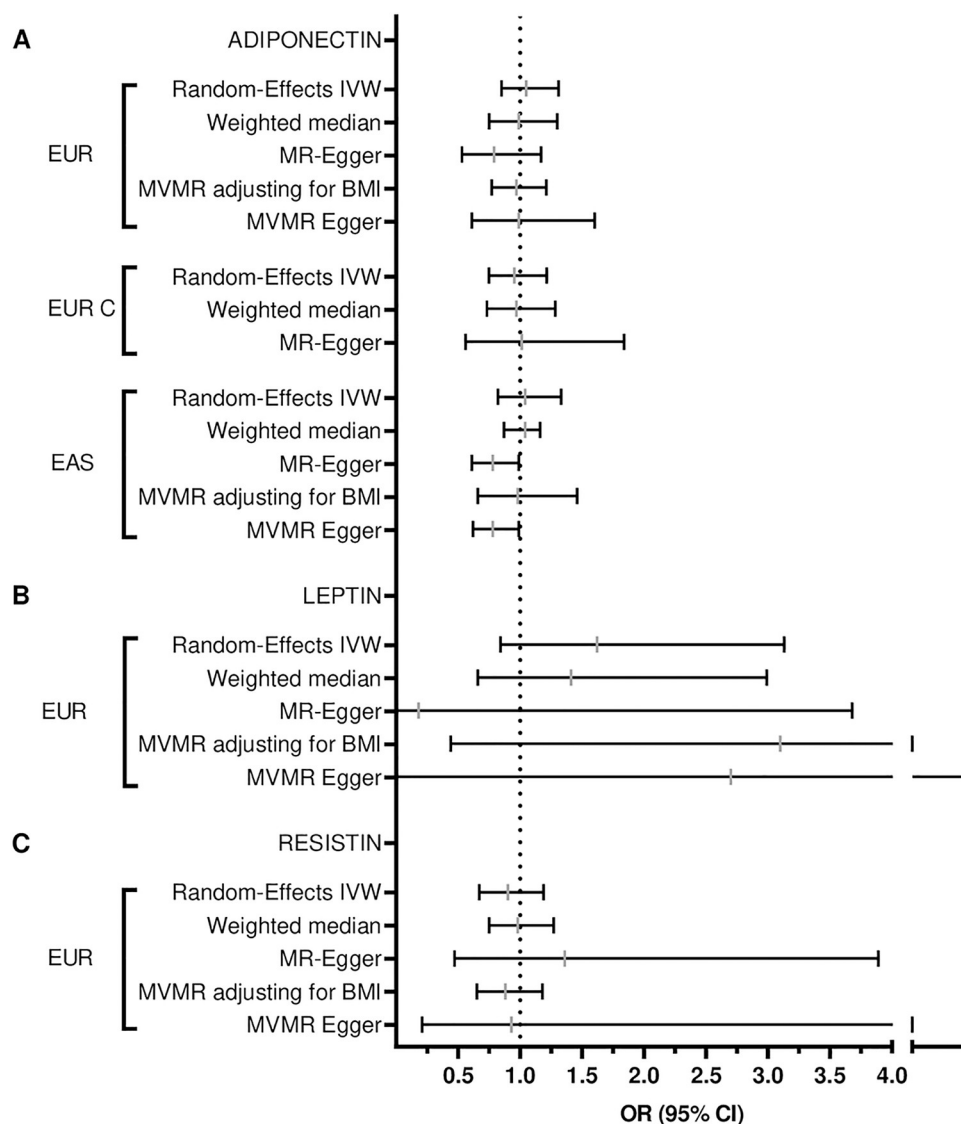

**Fig 1.** Forest plot of the causal effects of (A) adiponectin-, (B) leptin-, or (C) resistin-associated single nucleotide polymorphisms (SNPs) on rheumatoid arthritis (RA) risk. Shown are Mendelian randomisation (MR) results for Europeans (EUR) and East Asians (EAS). EUR C signifies a conservative approach for adiponectin to RA risk MR. An odds ratio (OR) is a measure of association between an exposure and an outcome, in which the OR represents the likelihood that an outcome will occur given a particular exposure, compared to the likelihood of the outcome occurring in the absence of that exposure. Statistical analyses were performed with the use of inverse-variance weighted (IVW) estimate, MR-Egger regression analysis and weighted median estimator. Multivariable MR (MVMR) was used to calculate the effect of adiponectin, leptin, and resistin to RA risk after adjustment for body mass index (BMI).

<https://doi.org/10.1371/journal.pone.0286981.g001>

East Asians (OR = 0.98; 95% CI = 0.66–1.46;  $p = 0.93$ . Table 1 and Fig 1A). The estimates provided by multivariable MR were comparable with the previous univariate MR analyses.

### No causal effect of leptin on the risk for RA

Next, we tested if leptin was causally linked to RA. The analysis was limited to individuals of European ancestry as no sufficiently large genetic studies on leptin levels in East Asians were found. No causal effect of circulating leptin on RA risk in Europeans was found by the



univariate MR analysis (OR = 1.62; 95% CI = 0.84–3.13;  $p = 0.15$ ) nor by subsequent sensitivity analyses (Table 1, Fig 1B and S1 Fig). Directional pleiotropy was unlikely to bias the results, as Egger intercept was not significant ( $p = 0.66$ ), adding reliability to the MR estimates. Additionally, the multivariable MR analysis accounting for BMI did not provide evidence of a causal effect of leptin on the risk for RA in Europeans (OR = 3.10; 95% CI = 0.44–21.93;  $p = 0.26$ ; Table 1 and Fig 1B).

### No causal effect of resistin on the risk for RA

Finally, we determined if resistin was causally linked to the risk for RA. This analysis was also limited to Europeans due to lack of sufficiently large genetic studies on resistin levels in East Asian individuals. Univariate MR analysis did not indicate a causal effect of circulating resistin on RA risk (OR = 0.90; 95% CI = 0.67–1.19;  $p = 0.46$ ; Table 1 and Fig 1C). Sensitivity analysis confirmed no causality between resistin levels and RA risk (Table 1, Fig 1C and S1 Fig). In addition, Egger intercept ( $p = 0.42$ ) suggested the absence of directional pleiotropy in our datasets. Furthermore, multivariable MR estimates did not support a causal effect of circulating resistin levels on RA risk when taking BMI into account (OR = 0.88; 95% CI = 0.65–1.18;  $p = 0.38$ ).

## Discussion

This two-sample MR study does not support a direct causal effect of circulating adiponectin, leptin, or resistin levels on the development of RA. The lack of effect was further confirmed by multivariable MR analyses, which took BMI into account.

Although both epidemiological and *in vitro* studies have linked adiponectin to the pathogenesis of RA, it was unknown if adiponectin has a direct causal effect on RA development [8, 9, 12, 35]. Recently, a univariate MR study in Europeans found that circulating levels of adiponectin do not have a causal effect on RA risk [15]. However, this study did not take BMI into account. High BMI is a risk factor for RA and is associated with lower circulating adiponectin levels. Thus, BMI is a confounder when studying the association between adiponectin and RA risk. Therefore, after the univariate MR analysis showed no causal link between adiponectin and RA risk, we decided to perform a multivariable MR to account for possible shared genetic background between circulating adiponectin and BMI. Multivariable MR is a method that allows estimation of the direct causal effects of each risk factor independently in a single analysis model [29, 33]. In our study, the multivariable MR analysis showed that circulating adiponectin is not causally linked to RA risk regardless of BMI.

Both leptin and resistin are increased in blood and synovial fluid of patients with RA compared to controls and they can induce the production of pro-inflammatory cytokines in fibroblast-like synoviocytes collected from patients with RA [3–6, 36–38]. However, our univariate MR analysis found that circulating leptin and resistin do not have a causal effect on the risk to develop RA. Since both circulating leptin and resistin levels are affected by BMI, we also performed a multivariable MR accounting for BMI. Multivariable MR confirmed the lack of effect of those adipokines on RA risk independently of BMI.

Our study focused on the effect of adipokines on the risk to develop RA, without any examination of disease progression, response to treatment, or comorbidities. Even if this MR study did not identify a causal link between adiponectin, leptin, or resistin and the risk of RA, it does not rule out that these adipokines might be involved in the pathogenesis of the disease, potentially by contributing to inflammation [4, 8–10]. Furthermore, they could also have a role as markers of RA activity or response to anti-rheumatic treatment, as suggested by previous results [39–41]. Consequently, despite our negative result on the causal effect of adiponectin,

leptin, and resistin on RA risk, the role of these adipokines in inflammation and immunomodulation is well documented and, thereby, not challenged by this study.

MR studies are powerful tools to assess causality between a certain exposure and a defined outcome. While observational studies are inherently likely to suffer from bias due to residual confounding or reverse causality, MR minimizes these possibilities. Nevertheless, MR is still susceptible to bias from the association of genetic variants with more than one outcome, an occurrence called pleiotropy. To avoid pleiotropy, we have not only performed a multivariable MR accounting for the confounding effect of BMI, but also a variety of sensitivity analyses. Another strength of this study is that we have included large cohorts of subjects with different genetic backgrounds, giving our study significant power to detect any causality.

This study is not without limitations. Only a small number of SNPs were selected as IVs in our analyses. Moreover, most genetic variants have a relatively limited effect on a particular exposure, e.g., circulating adipokine levels, as they might only explain a small proportion of variance in that exposure ( $R^2$  (%) range: 0.03–5.02). It is important to note that there are other factors besides BMI that can affect adipokine levels, such as diet, exercise, and lipid profile [42–45]. However, BMI is the main determinant as it is linked to the aforementioned factors. Moreover, BMI is easy to measure in large cohorts, and there is abundant availability of GWAS data on it. The selection of BMI was also based on its primary relevance as a known risk factor for RA [16]. In addition, adiponectin circulates in three main forms, high, middle, and low molecular weight adiponectin. The GWAS studies on adiponectin only measured total adiponectin levels in blood, without any information given on the levels of particular forms. It is unknown from these studies if any particular form of adiponectin is associated with specific SNPs. Of note, Egger intercept for circulating adiponectin in the East Asian population was significantly larger than zero, indicating the presence of pleiotropic genetic variants in this dataset. As evident from the leave-one-out analysis, a single SNP, rs4783244, was driving the main MR outcome in East Asians. However, rs4783244 is a valid instrument and its nearest gene is *CDH13* that encodes T-cadherin, a receptor for adiponectin, strengthening the biological link between the SNP and the exposure [46]. Ultimately, the MR results are unlikely to be caused by invalid instruments as IVW, the method carrying the greatest statistical power, as well as weighted median and MR-Egger did not support a causal association between adiponectin and RA in East Asians.

In conclusion, the results of the MR analysis show for the first time, to the best of our knowledge, that circulating adiponectin, leptin, or resistin levels do not have a direct causal effect on the risk of developing RA after adjustment for BMI. Therefore, the association of these adipokines' levels with RA, as suggested by epidemiological studies, does not appear to be causal.

## Supporting information

**S1 Fig. Leave-one-out sensitivity analysis.** Each point on the y axis represents the inverse variance weighted (IVW) method applied to estimate the causal effect of (A) adiponectin in Europeans, (B) adiponectin in East Asians, (C) leptin in Europeans, or (D) resistin in Europeans on rheumatoid arthritis risk, excluding that particular variant from the analysis. The final point of each plot depicts the IVW estimate of the main analysis using all genetic variants. (PDF)

**S1 Table. Main SNPs.**  
(XLSX)

**S2 Table. Proxies.**  
(XLSX)



## Acknowledgments

We would like to thank Maria Nethander, Jari Martikainen and Malin Östensson from the Bioinformatics Core Facility at the Sahlgrenska Academy for bioinformatics support. We would also like to thank all study participants who agreed to have their DNA used for genetic testing and all the people involved in the study consortia who made their data publicly available.

## Author Contributions

**Conceptualization:** Georgios K. Vasileiadis, Sizheng Steven Zhao, Cristina Maglio.

**Data curation:** Georgios K. Vasileiadis, Tahzeeb Fatima.

**Formal analysis:** Sergi Sayols, Tahzeeb Fatima.

**Funding acquisition:** Cristina Maglio.

**Investigation:** Georgios K. Vasileiadis.

**Methodology:** Georgios K. Vasileiadis, Sergi Sayols, Tahzeeb Fatima.

**Project administration:** Cristina Maglio.

**Software:** Sergi Sayols, Tahzeeb Fatima.

**Supervision:** Cristina Maglio.

**Validation:** Georgios K. Vasileiadis, Tahzeeb Fatima, Cristina Maglio.

**Visualization:** Georgios K. Vasileiadis.

**Writing – original draft:** Georgios K. Vasileiadis.

**Writing – review & editing:** Georgios K. Vasileiadis, Sergi Sayols, Sizheng Steven Zhao, Tahzeeb Fatima, Cristina Maglio.

## References

1. Carrion M, Frommer KW, Perez-Garcia S, Muller-Ladner U, Gomariz RP, Neumann E. The Adipokine Network in Rheumatic Joint Diseases. *International journal of molecular sciences*. 2019; 20(17). Epub 2019/08/25. <https://doi.org/10.3390/ijms20174091> PMID: 31443349; PubMed Central PMCID: PMC6747092.
2. Maeda N, Funahashi T, Matsuzawa Y, Shimomura I. Adiponectin, a unique adipocyte-derived factor beyond hormones. *Atherosclerosis*. 2019; 292:1–9. Epub 2019/11/16. <https://doi.org/10.1016/j.atherosclerosis.2019.10.021> PMID: 31731079.
3. Otero M, Lago R, Gomez R, Lago F, Dieguez C, Gomez-Reino JJ, et al. Changes in plasma levels of fat-derived hormones adiponectin, leptin, resistin and visfatin in patients with rheumatoid arthritis. *Ann Rheum Dis*. 2006; 65(9):1198–201. Epub 2006/01/18. <https://doi.org/10.1136/ard.2005.046540> PMID: 16414972; PubMed Central PMCID: PMC1798289.
4. Migita K, Maeda Y, Miyashita T, Kimura H, Nakamura M, Ishibashi H, et al. The serum levels of resistin in rheumatoid arthritis patients. *Clinical and experimental rheumatology*. 2006; 24(6):698–701. Epub 2007/01/09. PMID: 17207388.
5. Bokarewa M, Bokarew D, Hultgren O, Tarkowski A. Leptin consumption in the inflamed joints of patients with rheumatoid arthritis. *Annals of the Rheumatic Diseases*. 2003; 62(10):952. <https://doi.org/10.1136/ard.62.10.952> PMID: 12972473
6. Bokarewa M, Nagaev I, Dahlberg L, Smith U, Tarkowski A. Resistin, an adipokine with potent proinflammatory properties. *Journal of immunology (Baltimore, Md: 1950)*. 2005; 174(9):5789–95. Epub 2005/04/22. <https://doi.org/10.4049/jimmunol.174.9.5789> PMID: 15843582.
7. Tan W, Wang F, Zhang M, Guo D, Zhang Q, He S. High adiponectin and adiponectin receptor 1 expression in synovial fluids and synovial tissues of patients with rheumatoid arthritis. *Seminars in arthritis and*

- rheumatism. 2009; 38(6):420–7. Epub 20080418. <https://doi.org/10.1016/j.semarthrit.2008.01.017> PMID: 18395775.
8. Lei Y, Li X, Gao Z, Liu Y, Zhang B, Xia L, et al. Association Between Adiponectin and Clinical Manifestations in Rheumatoid Arthritis. *Journal of interferon & cytokine research: the official journal of the International Society for Interferon and Cytokine Research*. 2020; 40(10):501–8. Epub 2020/08/28. <https://doi.org/10.1089/jir.2020.0080> PMID: 32845789.
  9. Vasileiadis GK, Lundell AC, Zhang Y, Andersson K, Gjerdtsson I, Rudin A, et al. Adipocytokines in Untreated Newly Diagnosed Rheumatoid Arthritis: Association with Circulating Chemokines and Markers of Inflammation. *Biomolecules*. 2021; 11(2). Epub 20210221. <https://doi.org/10.3390/biom11020325> PMID: 33669910; PubMed Central PMCID: PMC7924659.
  10. Lee YH, Bae SC. Circulating leptin level in rheumatoid arthritis and its correlation with disease activity: a meta-analysis. *Zeitschrift für Rheumatologie*. 2016; 75(10):1021–7. <https://doi.org/10.1007/s00393-016-0050-1> PMID: 26820722
  11. Senolt L, Housa D, Vernerová Z, Jirásek T, Svobodová R, Veigl D, et al. Resistin in rheumatoid arthritis synovial tissue, synovial fluid and serum. *Annals of the rheumatic diseases*. 2007; 66(4):458–63. Epub 2006/10/13. <https://doi.org/10.1136/ard.2006.054734> PMID: 17040961.
  12. Zhang Y, Peltonen M, Andersson-Assarsson JC, Svensson PA, Herder C, Rudin A, et al. Elevated adiponectin predicts the development of rheumatoid arthritis in subjects with obesity. *Scandinavian journal of rheumatology*. 2020:1–9. Epub 2020/07/16. <https://doi.org/10.1080/03009742.2020.1753808> PMID: 32667228.
  13. Zhang Y, Johansson L, Andersson-Assarsson J, Taube M, Peltonen M, Svensson PA, et al. Adiponectin Associates with Rheumatoid Arthritis Risk in Overweight and Obesity Independently of Other Adipokines. *Journal of clinical medicine*. 2021; 10(13). Epub 2021/07/03. <https://doi.org/10.3390/jcm10132791> PMID: 34201946; PubMed Central PMCID: PMC8267689.
  14. Davey Smith G, Ebrahim S. 'Mendelian randomization': can genetic epidemiology contribute to understanding environmental determinants of disease?\*. *Int J Epidemiol*. 2003; 32(1):1–22. <https://doi.org/10.1093/ije/dyg070> PMID: 12689998
  15. Chen H, Mi S, Zhu J, Jin W, Li Y, Wang T, et al. No Causal Association Between Adiponectin and the Risk of Rheumatoid Arthritis: A Mendelian Randomization Study. *Frontiers in Genetics*. 2021;12. <https://doi.org/10.3389/fgene.2021.670282> PMID: 34630505
  16. Bae SC, Lee YH. Causal association between body mass index and risk of rheumatoid arthritis: A Mendelian randomization study. *European journal of clinical investigation*. 2019; 49(4):e13076. Epub 2019/02/03. <https://doi.org/10.1111/eci.13076> PMID: 30710354.
  17. Ouchi N, Parker JL, Lugus JJ, Walsh K. Adipokines in inflammation and metabolic disease. *Nature Reviews Immunology*. 2011; 11(2):85–97. <https://doi.org/10.1038/nri2921> PMID: 21252989
  18. Dastani Z, Hivert MF, Timpson N, Perry JR, Yuan X, Scott RA, et al. Novel loci for adiponectin levels and their influence on type 2 diabetes and metabolic traits: a multi-ethnic meta-analysis of 45,891 individuals. *PLoS genetics*. 2012; 8(3):e1002607. Epub 2012/04/06. <https://doi.org/10.1371/journal.pgen.1002607> PMID: 22479202; PubMed Central PMCID: PMC3315470 Vollenweider received grant money from GlaxoSmithKline to fund the CoLaus study. The other authors declare no competing financial interests.
  19. Wu Y, Gao H, Li H, Tabara Y, Nakatochi M, Chiu YF, et al. A meta-analysis of genome-wide association studies for adiponectin levels in East Asians identifies a novel locus near WDR11-FGFR2. *Human molecular genetics*. 2014; 23(4):1108–19. Epub 2013/10/10. <https://doi.org/10.1093/hmg/ddt488> PMID: 24105470; PubMed Central PMCID: PMC3900106.
  20. Kilpeläinen TO, Carli JF, Skowronski AA, Sun Q, Kriebel J, Feitosa MF, et al. Genome-wide meta-analysis uncovers novel loci influencing circulating leptin levels. *Nat Commun*. 2016; 7:10494. Epub 20160201. <https://doi.org/10.1038/ncomms10494> PMID: 26833098; PubMed Central PMCID: PMC4740377.
  21. Folkersen L, Gustafsson S, Wang Q, Hansen DH, Hedman ÅK, Schork A, et al. Genomic and drug target evaluation of 90 cardiovascular proteins in 30,931 individuals. *Nature Metabolism*. 2020; 2(10):1135–48. <https://doi.org/10.1038/s42255-020-00287-2> PMID: 33067605
  22. Okada Y, Wu D, Trynka G, Raj T, Terao C, Ikari K, et al. Genetics of rheumatoid arthritis contributes to biology and drug discovery. *Nature*. 2014; 506(7488):376–81. Epub 2014/01/07. <https://doi.org/10.1038/nature12873> PMID: 24390342; PubMed Central PMCID: PMC3944098.
  23. Arnett FC, Edworthy SM, Bloch DA, McShane DJ, Fries JF, Cooper NS, et al. The American Rheumatism Association 1987 revised criteria for the classification of rheumatoid arthritis. *Arthritis Rheum*. 1988; 31(3):315–24. <https://doi.org/10.1002/art.1780310302> PMID: 3358796.

24. Locke AE, Kahali B, Berndt SI, Justice AE, Pers TH, Day FR, et al. Genetic studies of body mass index yield new insights for obesity biology. *Nature*. 2015; 518(7538):197–206. <https://doi.org/10.1038/nature14177> PMID: 25673413
25. Yengo L, Sidorenko J, Kemper KE, Zheng Z, Wood AR, Weedon MN, et al. Meta-analysis of genome-wide association studies for height and body mass index in ~700000 individuals of European ancestry. *Human molecular genetics*. 2018; 27(20):3641–9. <https://doi.org/10.1093/hmg/ddy271> PMID: 30124842; PubMed Central PMCID: PMC6488973.
26. Akiyama M, Okada Y, Kanai M, Takahashi A, Momozawa Y, Ikeda M, et al. Genome-wide association study identifies 112 new loci for body mass index in the Japanese population. *Nature genetics*. 2017; 49(10):1458. <https://doi.org/10.1038/ng.3951> PMID: 28892062
27. Palmer TM, Lawlor DA, Harbord RM, Sheehan NA, Tobias JH, Timpson NJ, et al. Using multiple genetic variants as instrumental variables for modifiable risk factors. *Statistical Methods in Medical Research*. 2012; 21(3):223–42. <https://doi.org/10.1177/0962280210394459> PMID: 21216802.
28. Burgess S, Small DS, Thompson SG. A review of instrumental variable estimators for Mendelian randomization. *Stat Methods Med Res*. 2017; 26(5):2333–55. Epub 20150817. <https://doi.org/10.1177/0962280215597579> PMID: 26282889; PubMed Central PMCID: PMC5642006.
29. Burgess S, Davey Smith G, Davies N, Dudbridge F, Gill D, Glymour M, et al. Guidelines for performing Mendelian randomization investigations [version 2; peer review: 2 approved]. *Wellcome Open Research*. 2020; 4(186). <https://doi.org/10.12688/wellcomeopenres.15555.2> PMID: 32760811
30. Bowden J, Davey Smith G, Burgess S. Mendelian randomization with invalid instruments: effect estimation and bias detection through Egger regression. *Int J Epidemiol*. 2015; 44(2):512–25. Epub 20150606. <https://doi.org/10.1093/ije/dyv080> PMID: 26050253; PubMed Central PMCID: PMC4469799.
31. Yavorska OO, Burgess S. MendelianRandomization: an R package for performing Mendelian randomization analyses using summarized data. *International journal of epidemiology*. 2017; 46(6):1734–9. <https://doi.org/10.1093/ije/dyx034> PMID: 28398548
32. Broadbent JR, Foley CN, Grant AJ, Mason AM, Staley JR, Burgess S. MendelianRandomization v0.5.0: updates to an R package for performing Mendelian randomization analyses using summarized data. *Wellcome Open Research*. 2020;5.
33. Burgess S, Thompson SG. Multivariable Mendelian randomization: the use of pleiotropic genetic variants to estimate causal effects. *American journal of epidemiology*. 2015; 181(4):251–60. <https://doi.org/10.1093/aje/kwu283> PMID: 25632051
34. Rees JM, Wood AM, Burgess S. Extending the MR-Egger method for multivariable Mendelian randomization to correct for both measured and unmeasured pleiotropy. *Statistics in medicine*. 2017; 36(29):4705–18. <https://doi.org/10.1002/sim.7492> PMID: 28960498
35. Kitahara K, Kusunoki N, Kakiuchi T, Suguro T, Kawai S. Adiponectin stimulates IL-8 production by rheumatoid synovial fibroblasts. *Biochemical and biophysical research communications*. 2009; 378(2):218–23. Epub 2008/11/18. <https://doi.org/10.1016/j.bbrc.2008.11.017> PMID: 19013427.
36. Toussiot E. Mini-Review: The Contribution of Adipokines to Joint Inflammation in Inflammatory Rheumatic Diseases. *Frontiers in endocrinology*. 2020; 11. <https://doi.org/10.3389/fendo.2020.606560> PMID: 33424772
37. Muraoka S, Kusunoki N, Takahashi H, Tsuchiya K, Kawai S. Leptin stimulates interleukin-6 production via janus kinase 2/signal transducer and activator of transcription 3 in rheumatoid synovial fibroblasts. *Clinical and experimental rheumatology*. 2013; 31(4):589–95. Epub 2013/04/30. PMID: 23622344.
38. Sato H, Muraoka S, Kusunoki N, Masuoka S, Yamada S, Ogasawara H, et al. Resistin upregulates chemokine production by fibroblast-like synoviocytes from patients with rheumatoid arthritis. *Arthritis research & therapy*. 2017; 19(1):263–. <https://doi.org/10.1186/s13075-017-1472-0> PMID: 29191223.
39. Sikorska D, Rutkowski R, Luczak J, Samborski W, Witowski J. Serum adiponectin as a predictor of laboratory response to anti-TNF-alpha therapy in rheumatoid arthritis. *Cent Eur J Immunol*. 2018; 43(3):289–94. Epub 2018/12/28. <https://doi.org/10.5114/ceji.2018.80048> PMID: 30588174; PubMed Central PMCID: PMC6305609.
40. Meyer M, Sellam J, Fellahi S, Kotti S, Bastard JP, Meyer O, et al. Serum level of adiponectin is a surrogate independent biomarker of radiographic disease progression in early rheumatoid arthritis: results from the ESPOIR cohort. *Arthritis Res Ther*. 2013; 15(6):R210. Epub 2013/12/10. <https://doi.org/10.1186/ar4404> PMID: 24314299; PubMed Central PMCID: PMC3978925.
41. Minamino H, Katsushima M, Yoshida T, Hashimoto M, Fujita Y, Shirakashi M, et al. Increased circulating adiponectin is an independent disease activity marker in patients with rheumatoid arthritis: A cross-sectional study using the KURAMA database. *PLoS One*. 2020; 15(3):e0229998. Epub 2020/03/04. <https://doi.org/10.1371/journal.pone.0229998> PMID: 32126127.

42. Kozłowska L, Rydzewski A, Fiderkiewicz B, Wasińska-Krawczyk A, Grzechnik A, Rosołowska-Huszcz D. Adiponectin, resistin and leptin response to dietary intervention in diabetic nephropathy. *J Ren Nutr*. 2010; 20(4):255–62. Epub 20100526. <https://doi.org/10.1053/j.jrn.2010.01.009> PMID: 20537918.
43. Becic T, Studenik C, Hoffmann G. Exercise Increases Adiponectin and Reduces Leptin Levels in Prediabetic and Diabetic Individuals: Systematic Review and Meta-Analysis of Randomized Controlled Trials. *Med Sci (Basel)*. 2018; 6(4). Epub 20181030. <https://doi.org/10.3390/medsci6040097> PMID: 30380802; PubMed Central PMCID: PMC6318757.
44. Izadi V, Farabad E, Azadbakht L. Epidemiologic evidence on serum adiponectin level and lipid profile. *Int J Prev Med*. 2013; 4(2):133–40. PMID: 23543874; PubMed Central PMCID: PMC3604843.
45. Marcelino-Rodríguez I, Almeida Gonzalez D, Alemán-Sánchez JJ, Brito Díaz B, Rodríguez Pérez MDC, Gannar F, et al. Inverse association of resistin with physical activity in the general population. *PLoS One*. 2017; 12(8):e0182493. Epub 20170803. <https://doi.org/10.1371/journal.pone.0182493> PMID: 28771611; PubMed Central PMCID: PMC5542630.
46. Hug C, Wang J, Ahmad NS, Bogan JS, Tsao T-S, Lodish HF. T-cadherin is a receptor for hexameric and high-molecular-weight forms of Acrp30/adiponectin. *Proceedings of the National Academy of Sciences*. 2004; 101(28):10308–13. <https://doi.org/10.1073/pnas.0403382101> PMID: 15210937
